# Supplementary material
Source: Research Square preprint supplement (doi:10.21203/rs.3.rs-9880403/v1)
Supplement: Supplementary file 1 [file 00e55d0f43eb2789940e8565.pdf]

## Supplementary Material

**Table S1** Descriptive statistics by questionnaire, treatment condition, and sex

| Questionnaire | Sex    | Condition    | n  | Baseline (Mean<br>± SD) | Post<br>(Mean ± SD) | Mean<br>Change |
|---------------|--------|--------------|----|-------------------------|---------------------|----------------|
| MADRS         | Male   | Escitalopram | 20 | 27.0 (5.04)             | 19.4 (8.39)         | -7.60          |
| MADRS         | Male   | Psilocybin   | 17 | 27.7 (3.42)             | 14.1 (10.1)         | -13.60         |
| MADRS         | Female | Escitalopram | 9  | 26.6 (6.02)             | 20.8 (9.27)         | -5.78          |
| MADRS         | Female | Psilocybin   | 11 | 27.4 (4.43)             | 11.2 (10.1)         | -16.20         |
| QIDS          | Male   | Escitalopram | 20 | 15.8 (4.42)             | 9.90 (5.98)         | -5.95          |
| QIDS          | Male   | Psilocybin   | 19 | 14.3 (3.96)             | 7.53 (5.93)         | -6.79          |
| QIDS          | Female | Escitalopram | 9  | 17.8 (3.23)             | 10.4 (5.59)         | -7.33          |
| QIDS          | Female | Psilocybin   | 11 | 14.9 (3.91)             | 5.73 (6.05)         | -9.18          |
| BDI           | Male   | Escitalopram | 20 | 27.8 (7.15)             | 17.8 (10.6)         | -9.95          |
| BDI           | Male   | Psilocybin   | 19 | 28.1 (6.84)             | 12.3 (10.9)         | -15.80         |
| BDI           | Female | Escitalopram | 9  | 30.7 (6.54)             | 17.9 (12.8)         | -12.78         |
| BDI           | Female | Psilocybin   | 11 | 30.7 (6.60)             | 7.82 (11.2)         | -22.90         |
| SHAPS         | Male   | Escitalopram | 20 | 6.45 (3.66)             | 4.55 (4.44)         | -1.90          |
| SHAPS         | Male   | Psilocybin   | 19 | 6.21 (4.33)             | 1.84 (3.47)         | -4.37          |
| SHAPS         | Female | Escitalopram | 9  | 5.00 (2.55)             | 1.33 (2.18)         | -3.67          |

|        |        |              |    |             |             |        |
|--------|--------|--------------|----|-------------|-------------|--------|
| SHAPS  | Female | Psilocybin   | 11 | 6.64 (3.75) | 1.09 (2.70) | -5.55  |
| STAI   | Male   | Escitalopram | 20 | 64.6 (5.92) | 56.5 (10.0) | -8.10  |
| STAI   | Male   | Psilocybin   | 19 | 62.9 (7.45) | 50.9 (11.0) | -11.90 |
| STAI   | Female | Escitalopram | 9  | 67.9 (7.01) | 57.0 (14.3) | -10.90 |
| STAI   | Female | Psilocybin   | 11 | 66.7 (4.08) | 40.6 (12.9) | -26.10 |
| WBSI   | Male   | Escitalopram | 19 | 54.6 (6.53) | 52.1 (7.43) | -2.53  |
| WBSI   | Male   | Psilocybin   | 18 | 54.8 (7.06) | 45.9 (12.7) | -8.94  |
| WBSI   | Female | Escitalopram | 9  | 55.0 (5.27) | 51.4 (10.1) | -3.56  |
| WBSI   | Female | Psilocybin   | 10 | 52.7 (6.07) | 42.0 (17.2) | -10.70 |
| WEMWBS | Male   | Escitalopram | 18 | 30.3 (5.57) | 35.5 (6.48) | 5.22   |
| WEMWBS | Male   | Psilocybin   | 17 | 29.0 (6.47) | 42.0 (13.0) | 13.00  |
| WEMWBS | Female | Escitalopram | 8  | 30.4 (6.86) | 38.1 (10.6) | 7.75   |
| WEMWBS | Female | Psilocybin   | 10 | 28.1 (5.47) | 43.8 (12.7) | 15.70  |

**Note:** Values represent means with standard deviations in parentheses. Change scores were calculated as post-treatment minus baseline. Negative values indicate symptom reduction for MADRS, QIDS, BDI, SHAPS, STAI, and WBSI, whereas positive values indicate improvement for WEMWBS. n indicates the number of participants in each subgroup. All values are based on unadjusted raw questionnaire scores.

**Table S2 Frequentist comparisons of variance and mean difference by treatment condition and time point**

| Questionnaire | Condition    | Outcome  | F (p)<br>Variance Test | t (p)<br>Mean Test   | Mean Difference<br>[95% CI] |
|---------------|--------------|----------|------------------------|----------------------|-----------------------------|
| MADRS         | Escitalopram | Baseline | 0.70 (0.495)           | 0.19 (0.850)         | 0.44 [-4.52, 5.41]          |
| MADRS         | Escitalopram | Post     | 0.82 (0.680)           | -0.38 (0.709)        | -1.38 [-9.12, 6.37]         |
| MADRS         | Escitalopram | Change   | 0.46 (0.155)           | -0.42 (0.683)        | -1.82 [-11.34, 7.69]        |
| MADRS         | Psilocybin   | Baseline | 0.60 (0.344)           | 0.22 (0.830)         | 0.34 [-2.97, 3.65]          |
| MADRS         | Psilocybin   | Post     | 1.00 (0.967)           | 0.75 (0.462)         | 2.94 [-5.20, 11.08]         |
| MADRS         | Psilocybin   | Change   | 1.03 (0.999)           | 0.71 (0.484)         | 2.59 [-4.97, 10.16]         |
| QIDS          | Escitalopram | Baseline | 1.87 (0.369)           | -1.32 (0.201)        | -1.93 [-4.97, 1.11]         |
| QIDS          | Escitalopram | Post     | 1.14 (0.891)           | -0.24 (0.815)        | -0.54 [-5.40, 4.31]         |
| QIDS          | Escitalopram | Change   | 0.77 (0.600)           | 0.58 (0.569)         | 1.38 [-3.70, 6.47]          |
| QIDS          | Psilocybin   | Baseline | 1.03 (0.992)           | -0.40 (0.694)        | -0.59 [-3.69, 2.50]         |
| QIDS          | Psilocybin   | Post     | 0.96 (0.900)           | 0.79 (0.438)         | 1.80 [-2.94, 6.54]          |
| QIDS          | Psilocybin   | Change   | 1.46 (0.551)           | 1.08 (0.290)         | 2.39 [-2.17, 6.95]          |
| BDI           | Escitalopram | Baseline | 1.20 (0.835)           | -1.06 (0.304)        | -2.87 [-8.57, 2.84]         |
| BDI           | Escitalopram | Post     | 0.69 (0.481)           | -0.01 (0.994)        | -0.04 [-10.55, 10.47]       |
| BDI           | Escitalopram | Change   | 0.65 (0.412)           | 0.65 (0.526)         | 2.83 [-6.54, 12.20]         |
| BDI           | Psilocybin   | Baseline | 1.07 (0.945)           | -1.03 (0.312)        | -2.62 [-7.88, 2.64]         |
| BDI           | Psilocybin   | Post     | 0.96 (0.900)           | 1.07 (0.296)         | 4.50 [-4.24, 13.24]         |
| BDI           | Psilocybin   | Change   | 1.23 (0.759)           | 1.62 (0.120)         | 7.12 [-1.99, 16.24]         |
| SHAPS         | Escitalopram | Baseline | 2.06 (0.296)           | 1.23 (0.232)         | 1.45 [-1.00, 3.90]          |
| SHAPS         | Escitalopram | Post     | 4.15 (0.045*)          | <b>2.61 (0.015*)</b> | 3.22 [0.69, 5.74]           |
| SHAPS         | Escitalopram | Change   | 1.11 (0.928)           | 1.39 (0.185)         | 1.77 [-0.93, 4.47]          |
| SHAPS         | Psilocybin   | Baseline | 1.33 (0.657)           | -0.28 (0.780)        | -0.43 [-3.53, 2.68]         |

|               |                   |               |                     |                      |                            |
|---------------|-------------------|---------------|---------------------|----------------------|----------------------------|
| <b>SHAPS</b>  | Psilocybin        | Post          | 1.65 (0.422)        | 0.66 (0.515)         | 0.75 [-1.59, 3.09]         |
| <b>SHAPS</b>  | Psilocybin        | Change        | 0.98 (0.935)        | 0.82 (0.422)         | 1.18 [-1.81, 4.17]         |
| <b>STAI</b>   | Escitalopram      | Baseline      | 0.71 (0.518)        | -1.22 (0.242)        | -3.29 [-9.07, 2.50]        |
| <b>STAI</b>   | Escitalopram      | Post          | 0.49 (0.193)        | -0.10 (0.926)        | -0.50 [-12.00, 11.00]      |
| <b>STAI</b>   | Escitalopram      | Change        | 0.65 (0.413)        | 0.64 (0.535)         | 2.79 [-6.67, 12.25]        |
| <b>STAI</b>   | Psilocybin        | Baseline      | 3.34 (0.056)        | -1.82 (0.079)        | -3.83 [-8.14, 0.48]        |
| <b>STAI</b>   | Psilocybin        | Post          | 0.73 (0.536)        | 2.23 (0.039*)        | 10.31 [0.60, 20.02]        |
| <b>STAI</b>   | <b>Psilocybin</b> | <b>Change</b> | <b>0.54 (0.241)</b> | <b>2.64 (0.018*)</b> | <b>14.14 [2.80, 25.48]</b> |
| <b>WBSI</b>   | Escitalopram      | Baseline      | 1.54 (0.546)        | -0.18 (0.857)        | -0.42 [-5.25, 4.41]        |
| <b>WBSI</b>   | Escitalopram      | Post          | 0.54 (0.260)        | 0.16 (0.875)         | 0.61 [-7.62, 8.84]         |
| <b>WBSI</b>   | Escitalopram      | Change        | 1.45 (0.611)        | 0.32 (0.755)         | 1.03 [-5.77, 7.83]         |
| <b>WBSI</b>   | Psilocybin        | Baseline      | 1.35 (0.664)        | 0.84 (0.411)         | 2.13 [-3.15, 7.41]         |
| <b>WBSI</b>   | Psilocybin        | Post          | 0.54 (0.268)        | 0.63 (0.541)         | 3.89 [-9.40, 17.18]        |
| <b>WBSI</b>   | Psilocybin        | Change        | 0.74 (0.562)        | 0.32 (0.756)         | 1.76 [-10.00, 13.51]       |
| <b>WEMWBS</b> | Escitalopram      | Baseline      | 0.66 (0.454)        | -0.04 (0.973)        | 0.10 [-6.15, 5.96]         |
| <b>WEMWBS</b> | Escitalopram      | Post          | 0.37 (0.090)        | -0.65 (0.534)        | -2.63 [-11.75, 6.50]       |
| <b>WEMWBS</b> | Escitalopram      | Change        | 0.31 (0.048*)       | -0.57 (0.585)        | -2.53 [-12.61, 7.56]       |
| <b>WEMWBS</b> | Psilocybin        | Baseline      | 1.40 (0.620)        | 0.39 (0.704)         | 0.90 [-3.95, 5.75]         |
| <b>WEMWBS</b> | Psilocybin        | Post          | 1.04 (0.996)        | -0.35 (0.729)        | -1.80 [-12.48, 8.88]       |
| <b>WEMWBS</b> | Psilocybin        | Change        | 1.12 (0.900)        | -0.50 (0.621)        | -2.70 [-13.93, 8.53]       |

**Note:** F = Levene's test statistic for equality of variances; t = Welch's t-test statistic for mean differences between females and males within each treatment condition; CI = confidence interval. Positive mean differences reflect higher scores for females than males. Asterisks (\*) indicate statistically significant differences at  $p < .05$ .

**Table S3** Bayes Factor under original and wide prior specifications

| Questionnaire | Comparison   | Wide Prior<br>(BF_any / BF_MCID /<br>BF_NI) | Original Prior<br>(BF_any / BF_MCID /<br>BF_NI) | Original Prior Mean<br>[95% CI] |
|---------------|--------------|---------------------------------------------|-------------------------------------------------|---------------------------------|
| MADRS         | Escitalopram | 2.02 / 0.351 / 2.35                         | 1.79 / 0.269 / 2.82                             | 1.12 [-4.37, 7.03]              |
| MADRS         | Psilocybin   | 0.270 / 0.299 / 2.76                        | 0.251 / 0.307 / 3.06                            | -2.57 [-8.63, 3.65]             |
| MADRS         | Interaction  | 0.217 / 0.864 / 1.06                        | 0.202 / 0.796 / 1.20                            | -3.70 [-11.1, 3.81]             |
| QIDS          | Escitalopram | 0.665 / 0.142 / 4.14                        | 0.646 / 0.133 / 4.24                            | -0.55 [-4.65, 3.47]             |
| QIDS          | Psilocybin   | 0.175 / 0.209 / 3.54                        | 0.171 / 0.201 / 3.48                            | -2.04 [-6.15, 1.90]             |
| QIDS          | Interaction  | 0.415 / 0.316 / 2.49                        | 0.417 / 0.288 / 2.80                            | -1.49 [-6.83, 3.82]             |
| BDI           | Escitalopram | 0.521 / 0.356 / 2.34                        | 0.432 / 0.285 / 2.63                            | -1.58 [-8.27, 5.18]             |
| BDI           | Psilocybin   | 0.0523 / 1.00 / 0.815                       | 0.0496 / 0.894 / 0.867                          | -5.37 [-12.6, 1.88]             |
| BDI           | Interaction  | 0.263 / 0.900 / 1.03                        | 0.213 / 0.730 / 1.15                            | -3.79 [-12.3, 4.85]             |
| SHAPS         | Escitalopram | 0.0217 / 0.562 / 0.997                      | 0.0259 / 0.520 / 0.957                          | <b>-2.36 [-4.63, 0.00]</b>      |
| SHAPS         | Psilocybin   | 0.239 / 0.0527 / 8.45                       | 0.220 / 0.0493 / 8.17                           | -1.03 [-3.25, 1.16]             |
| SHAPS         | Interaction  | 4.10 / 0.180 / 3.70                         | 4.05 / 0.164 / 4.00                             | 1.34 [-1.87, 4.49]              |
| STAI          | Escitalopram | 0.503 / 0.428 / 1.98                        | 0.293 / 0.470 / 1.67                            | -2.54 [-9.33, 4.07]             |
| STAI          | Psilocybin   | 0.00154 / 20.3 / 0.0214                     | 0.00231 / 13.0 / 0.0620                         | <b>-10.5 [-17.5, -3.29]</b>     |
| STAI          | Interaction  | 0.0289 / 4.76 / 0.224                       | 0.0342 / 3.10 / 0.293                           | -7.97 [-16.3, 0.45]             |
| WBSI          | Escitalopram | 0.731 / 0.345 / 2.15                        | 0.695 / 0.256 / 2.55                            | -0.76 [-7.38, 5.84]             |
| WBSI          | Psilocybin   | 0.353 / 0.289 / 2.57                        | 0.315 / 0.273 / 2.72                            | -2.52 [-9.51, 4.49]             |

|        |              |                      |                      |                     |
|--------|--------------|----------------------|----------------------|---------------------|
| WBSI   | Interaction  | 0.614 / 0.587 / 1.51 | 0.538 / 0.451 / 2.11 | -1.76 [-10.4, 6.71] |
| WEMWBS | Escitalopram | 2.57 / 0.518 / 1.71  | 2.38 / 0.363 / 2.09  | 1.81 [-4.62, 8.37]  |
| WEMWBS | Psilocybin   | 2.68 / 0.293 / 2.57  | 3.20 / 0.279 / 2.64  | 2.50 [-4.25, 9.38]  |
| WEMWBS | Interaction  | 0.964 / 0.566 / 1.60 | 1.24 / 0.438 / 1.96  | 0.687 [-7.59, 9.04] |

**Note:** BF = Bayes factor; BF\_any = evidence for any nonzero effect; BF\_MCID = evidence that the effect exceeds the minimally clinically important difference; BF\_NI = evidence for non-inferiority; CrI = credible interval. Values are presented as Bayes Factor (BF) estimates under two prior specifications: wide prior (more diffuse) and original prior (study-defined). BFs < 1 favor the null; BFs > 1 favor the alternative. Interpretative thresholds: BF < 0.33 = moderate evidence for the null, BF 0.33–3 = weak/inconclusive evidence, BF > 3 = moderate-to-strong evidence for an effect. Bolded rows indicate CrIs that do not include zero, suggesting a potentially meaningful treatment effect.

**Fig. S1** Posterior contrast for sex differences across all clinical questionnaires under sceptical and wide priors

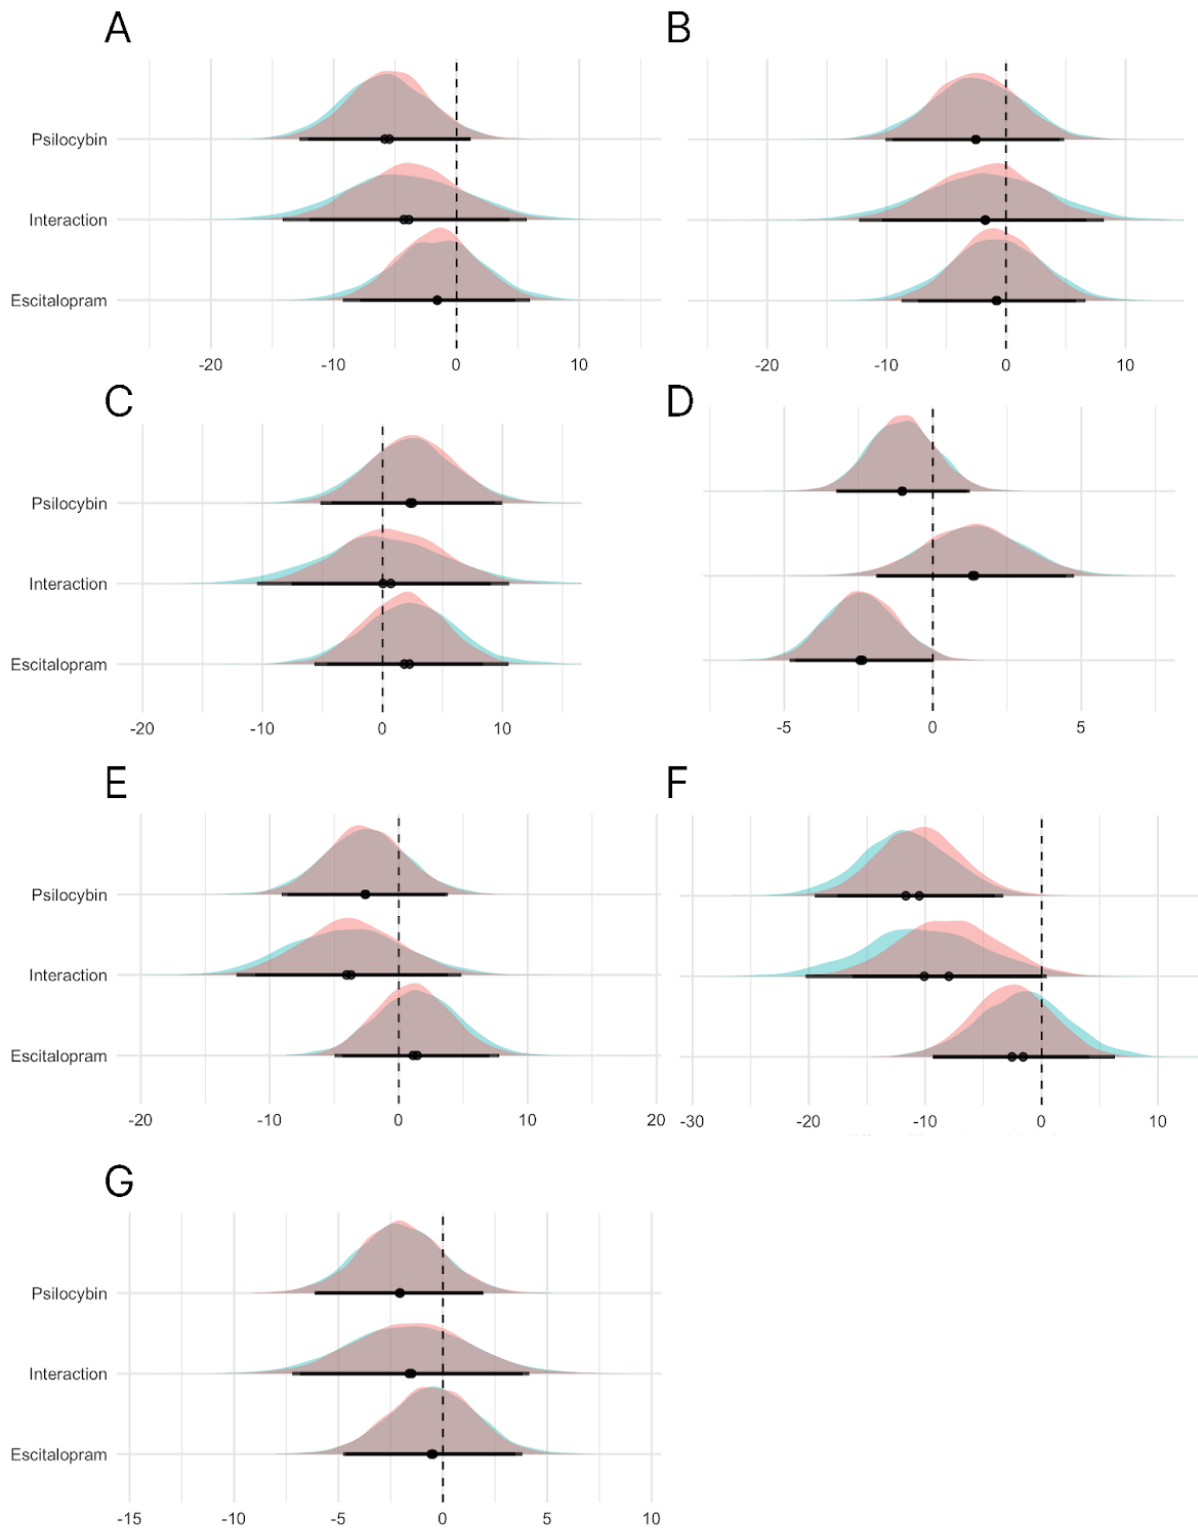

**Notes:** The graph shows posterior distributions for female–male contrasts within psilocybin (top), interaction (middle), and escitalopram (bottom) contrasts for each questionnaire. Panel A-G corresponds to (A) BDI, Beck Depression Inventory; (B) WBSI, White Bear Suppression Inventory; (C) WEMWBS, Warwick–Edinburgh

Mental Well-being Scale; (D) SHAPS, Snaith–Hamilton Pleasure Scale; (E) MADRS, Montgomery–Åsberg Depression Rating Scale; (F) STAI, State–Trait Anxiety Inventory; and (G) QIDS, Quick Inventory of Depressive Symptomatology. Red distributions use the sceptical prior, whereas blue distributions use the wide prior. Points indicate posterior means with 95% credible intervals. The dashed vertical line represents zero (no sex difference). Negative values reflect greater improvement in females. While most estimates overlapped zero, STAI showed robust negative contrasts under psilocybin, indicating larger anxiety reductions in women. The x-axis indicates the effect size (female-male).
